# Supplementary material for: Hippocampal Neuro-Networks and Dendritic Spine Perturbations in Epileptogenesis Are Attenuated by Neuroprotectin D1
Source: PubMed Central journal article supplement (PMC4305283; doi:10.1371/journal.pone.0116543), 2015-01-24

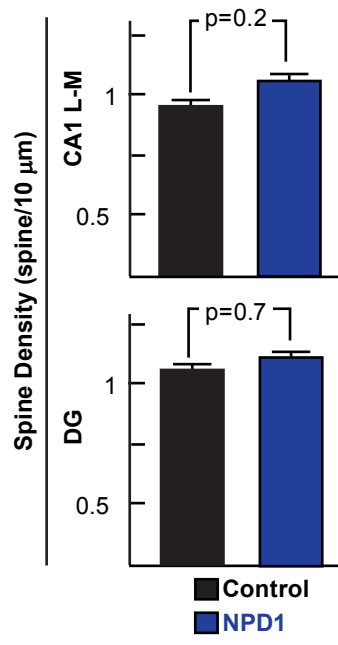

Supplement: pone.0116543.s002.pdf [file pone.0116543.s002.pdf]
